# Supplementary material for: Rational design of non-fullerene acceptors via side-chain and terminal group engineering: a computational study
Source: Royal Society of Chemistry journal article supplement (doi:10.1039/d2cp05958d), 2023-01-01
Supplement: d2cp05958d1.pdf [file d2cp05958d1.pdf]

**Supporting Information:**

**Rational Design of Non-Fullerene Acceptors via  
Side-Chain and Terminal Group Engineering: A  
Computational Study**

Rudranarayan Khatua,<sup>†,‡</sup> Bibhas Das,<sup>†,‡</sup> and Anirban Mondal<sup>\*,†</sup>

*†Discipline of Chemistry, Indian Institute of Technology Gandhinagar, Gujarat, 382355,  
India*

*‡Contributed equally to this work*

E-mail: [amondal@iitgn.ac.in](mailto:amondal@iitgn.ac.in)

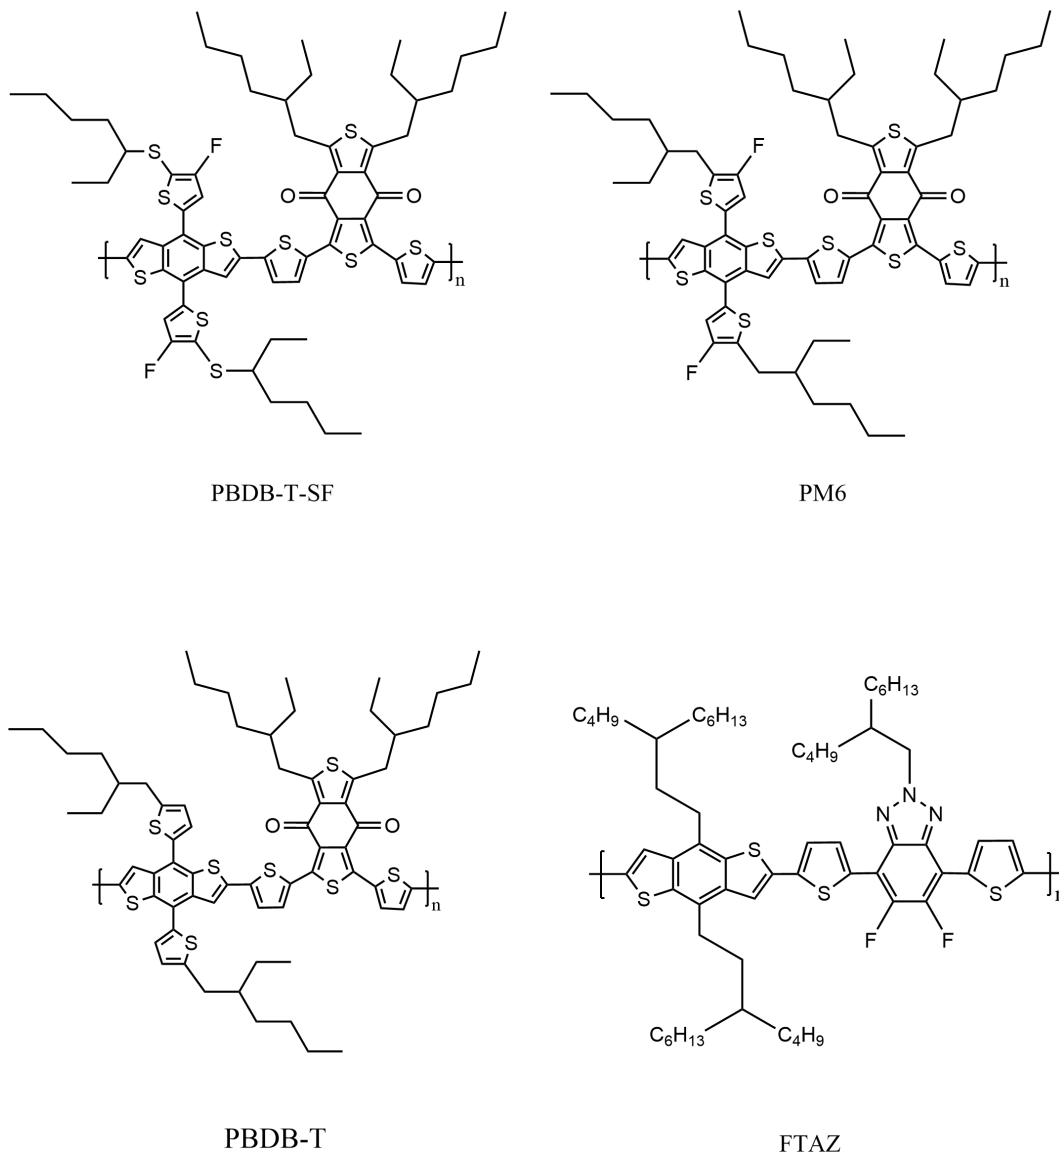

Figure S1: Chemical structure of the four donors; PBDB-T-SF, PM-6, PBDB-T, and FTAZ. Optimization of the donor polymers were performed at B3LYP/6-31G(d,p) level of theory using one monomer unit.

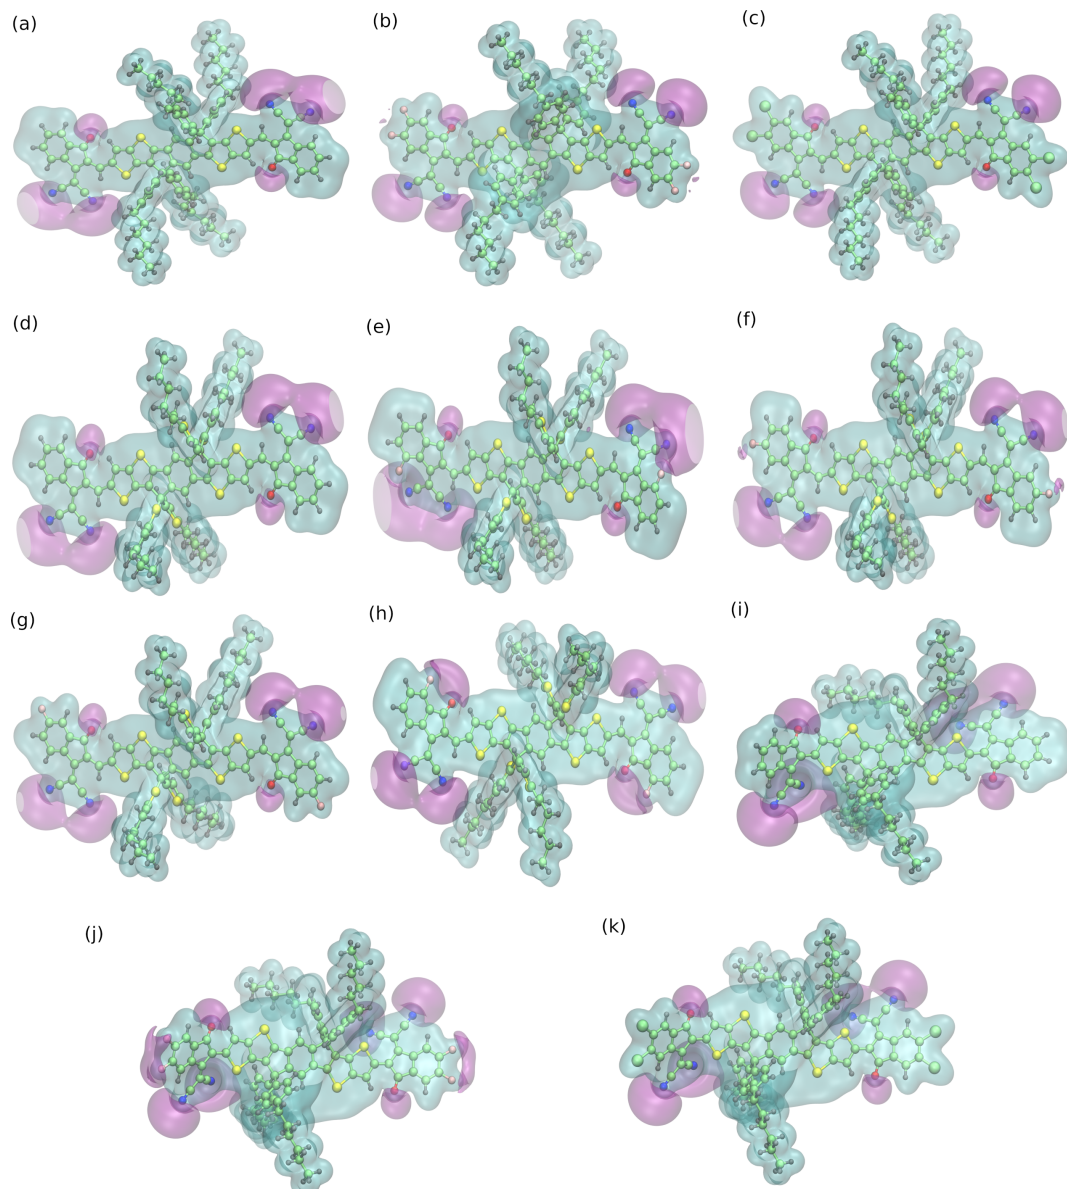

Figure S2: Iso-electrostatic potential surfaces of selected non-fullerene acceptors: (a) IT-H; (b) IT-F; (c) IT-Cl; (d) ITIC-Th; (e) ITIC-Th-1; (f) ITIC-Th-2; (g) ITIC-Th-3; (h) ITIC-Th-4; (i) SeTIC; (j) SeTIC-F; and (k) SeTIC-Cl.

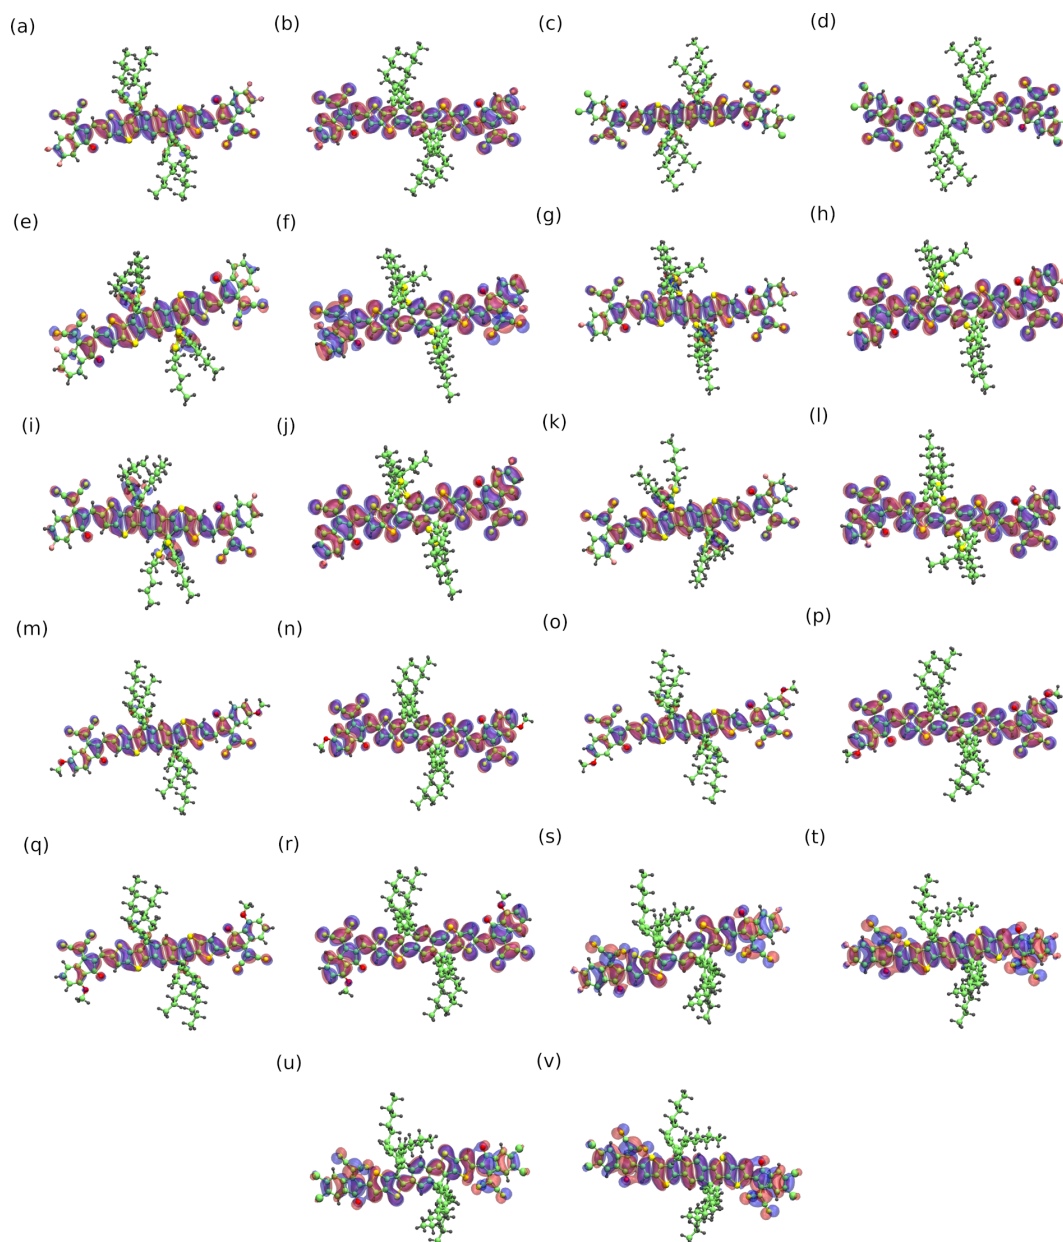

Figure S3: Frontier molecular orbitals of selected non-fullerene acceptors. **HOMO**: (a) IT-F; (c) IT-Cl; (e) ITIC-Th-1; (g) ITIC-Th-2; (i) ITIC-Th-3; (k) ITIC-Th-4; (m) IT-OMe-2; (o) IT-OMe-3; (q) IT-OMe-4; (s) SeTIC-F; (u) SeTIC-Cl. **LUMO**: (b) IT-F; (d) IT-Cl; (f) ITIC-Th-1; (h) ITIC-Th-2; (j) ITIC-Th-3; (l) ITIC-Th-4; (n) IT-OMe-2; (p) IT-OMe-3; (r) IT-OMe-4; (t) SeTIC-F; (v) SeTIC-Cl.

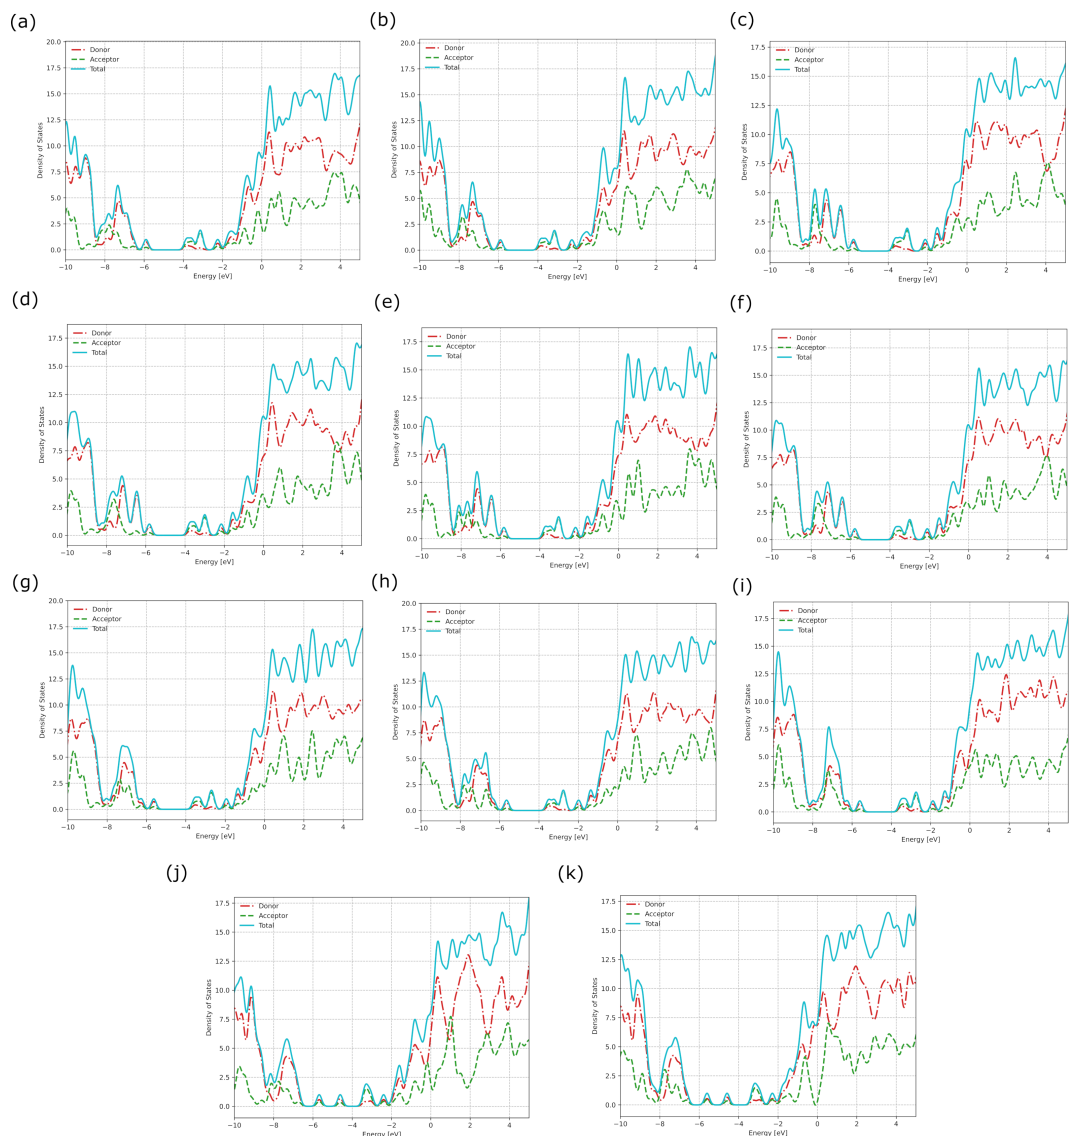

Figure S4: The total and partial density of states (PDOS) computed at the B3LYP/6-31+G(d,p) level for the selected NFA molecules – (a) IT-F; (b) IT-Cl; (c) ITIC-Th-1; (d) ITIC-Th-2; (e) ITIC-Th-3; (f) ITIC-Th-4; (g) IT-OMe-2; (h) IT-OMe-3; (i) IT-OMe-4; (j) SeTIC-F; (k) SeTIC-Cl.

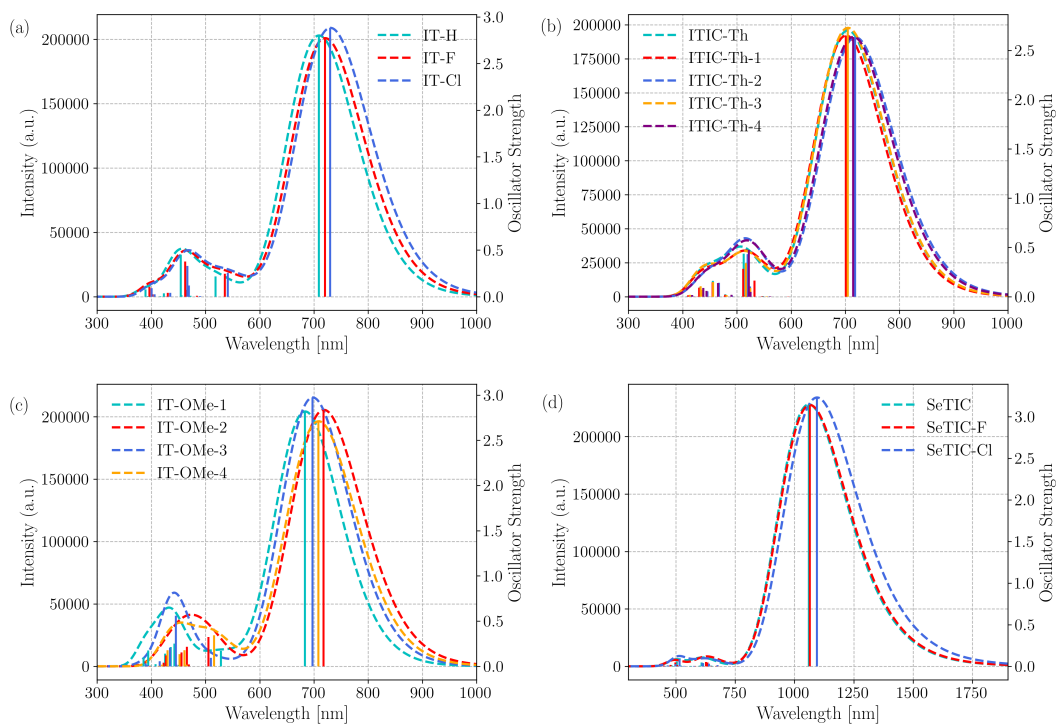

Figure S5: The absorption spectra of NFA molecules computed at TD-DFT/B3LYP/6-31+G(d,p) level in  $\text{CHCl}_3$  solvent (CPCM model).

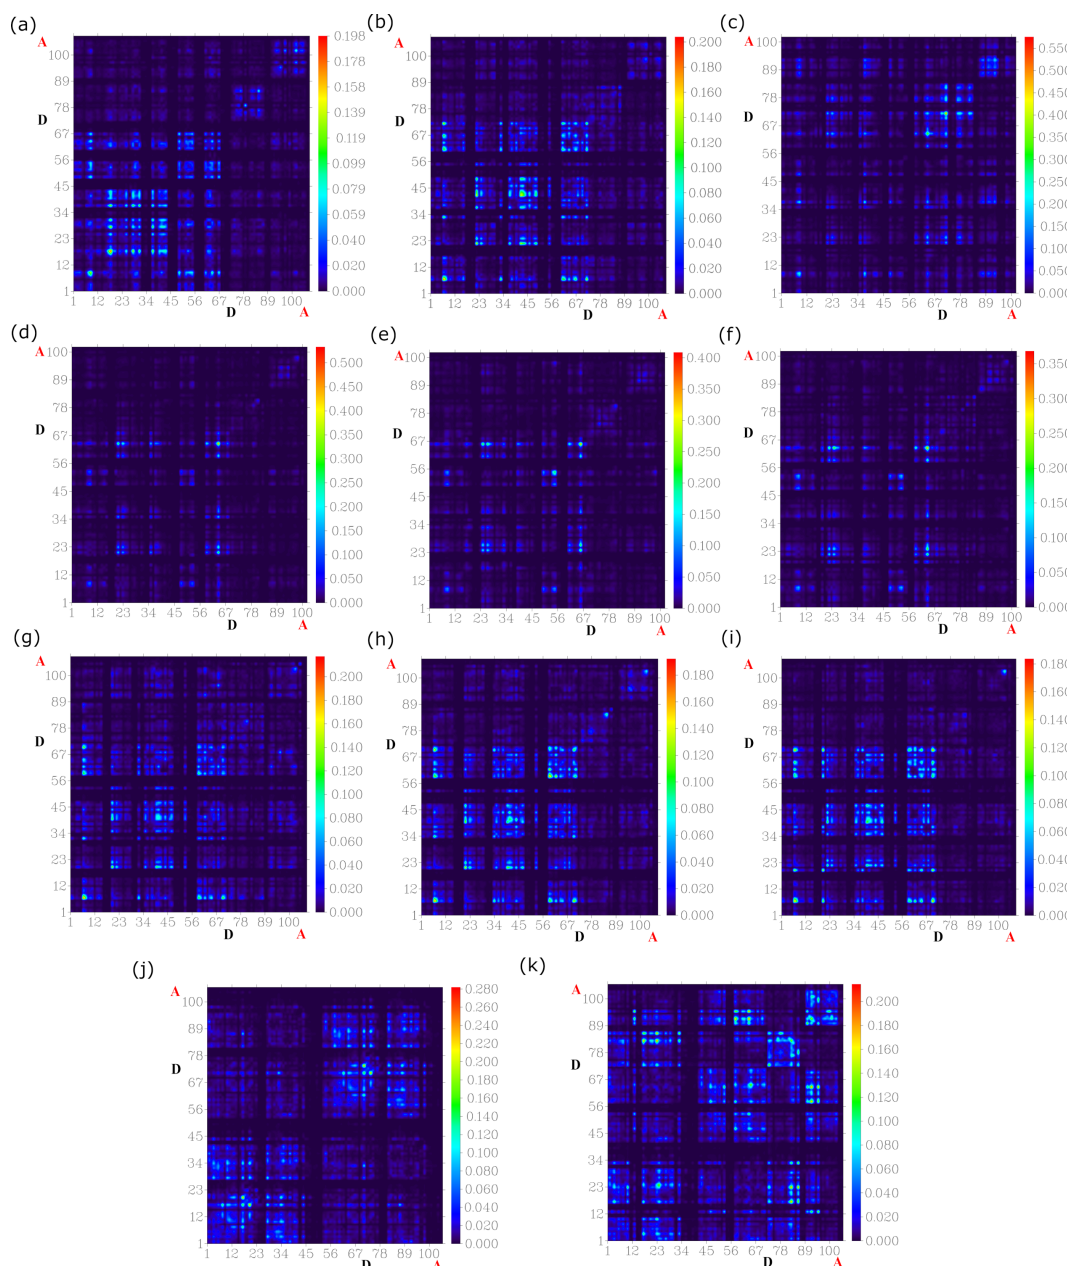

Figure S6: Transition density matrix (TDM) of selected non-fullerene acceptors: (a) IT-F; (b) IT-Cl; (c) ITIC-Th-1; (d) ITIC-Th-2; (e) ITIC-Th-3; (f) ITIC-Th-4; (g) IT-OMe-2; (h) IT-OMe-3; (i) IT-OMe-4; (j) SeTIC-F; (k) SeTIC-Cl.

**Table S1:** Computed ionization energy (IE), electron affinity (EA), reorganization energy of electron and hole ( $\lambda_e$  and  $\lambda_h$ ), HOMO energy, LUMO energy, HOMO-LUMO (H-L) gap, dipole moment ( $\mu$ ), and dihedral angles ( $\delta_1$  and  $\delta_2$ ) of the neutral geometry of NFAs at B3LYP/6-31+G(d,p) level.

| Compounds | IE    | EA    | $\lambda_h$ | $\lambda_e$ | HOMO   | LUMO   | H-L gap | $\mu$   | $\delta_1$   | $\delta_2$   |
|-----------|-------|-------|-------------|-------------|--------|--------|---------|---------|--------------|--------------|
|           | (eV)  | (eV)  | (eV)        | (eV)        | (eV)   | (eV)   | (eV)    | (Debye) | ( $^\circ$ ) | ( $^\circ$ ) |
| IT-H      | 6.399 | 2.969 | 0.169       | 0.156       | -5.730 | -3.632 | 2.098   | 0.000   | 1.272        | 1.272        |
| IT-F      | 6.558 | 3.171 | 0.183       | 0.157       | -5.891 | -3.824 | 2.067   | 0.033   | 0.134        | 0.322        |
| IT-Cl     | 6.543 | 3.201 | 0.172       | 0.149       | -5.896 | -3.846 | 2.049   | 0.003   | 0.378        | 0.364        |
| ITIC-Th   | 6.401 | 2.962 | 0.164       | 0.157       | -5.730 | -3.628 | 2.101   | 0.101   | 0.347        | 0.398        |
| ITIC-Th-1 | 6.426 | 2.983 | 0.171       | 0.187       | -5.752 | -3.635 | 2.117   | 5.590   | 4.281        | 4.579        |
| ITIC-Th-2 | 6.479 | 3.082 | 0.165       | 0.147       | -5.807 | -3.745 | 2.062   | 0.068   | 0.926        | 0.898        |
| ITIC-Th-3 | 6.492 | 3.062 | 0.167       | 0.167       | -5.817 | -3.716 | 2.100   | 0.079   | 0.777        | 0.738        |
| ITIC-Th-4 | 6.447 | 3.043 | 0.165       | 0.149       | -5.774 | -3.706 | 2.068   | 0.088   | 1.524        | 1.480        |
| IT-OMe-1  | 6.228 | 2.757 | 0.183       | 0.212       | -5.566 | -3.389 | 2.177   | 0.000   | 5.535        | 5.537        |
| IT-OMe-2  | 6.271 | 2.886 | 0.173       | 0.161       | -5.618 | -3.538 | 2.080   | 0.043   | 1.251        | 1.234        |
| IT-OMe-3  | 6.294 | 2.863 | 0.177       | 0.182       | -5.638 | -3.501 | 2.136   | 0.064   | 0.470        | 0.614        |
| IT-OMe-4  | 6.256 | 2.837 | 0.172       | 0.162       | -5.594 | -3.492 | 2.102   | 0.033   | 1.656        | 1.632        |
| SeTIC     | 6.065 | 3.765 | 0.135       | 0.322       | -5.389 | -4.364 | 1.025   | 6.726   | 16.840       | 16.841       |
| SeTIC-F   | 6.261 | 3.969 | 0.137       | 0.327       | -5.581 | -4.556 | 1.025   | 4.095   | 16.985       | 16.985       |
| SeTIC-Cl  | 6.241 | 3.987 | 0.134       | 0.320       | -5.593 | -4.576 | 1.017   | 4.415   | 17.112       | 17.112       |



**Table S2:** The HOMO and LUMO energy levels of donor polymers, NFAs, and computed open circuit voltages ( $V_{OC}$ ) for each combination of donor polymer and NFA molecule. The subscript number in  $V_{OC}$  represents the donor index against which the values are derived.

| Donor        | HOMO<br>(eV) | LUMO<br>(eV) | NFAs      | LUMO<br>(eV) | $V_{OC1}$<br>(V) | $V_{OC2}$<br>(V) | $V_{OC3}$<br>(V) | $V_{OC4}$<br>(V) |
|--------------|--------------|--------------|-----------|--------------|------------------|------------------|------------------|------------------|
| 1: PBDB-T    | -5.221       | -2.611       | IT-H      | -3.632       | 1.289            | 1.526            | 1.434            | 1.302            |
| 2: PBDB-T-SF | -5.458       | -2.749       | IT-F      | -3.824       | 1.097            | 1.334            | 1.242            | 1.110            |
| 3: PM6       | -5.366       | -2.712       | IT-Cl     | -3.846       | 1.075            | 1.312            | 1.220            | 1.088            |
| 4: FTAZ      | -5.234       | -2.528       | ITIC-Th   | -3.628       | 1.293            | 1.530            | 1.438            | 1.306            |
|              |              |              | ITIC-Th-1 | -3.635       | 1.286            | 1.523            | 1.431            | 1.299            |
|              |              |              | ITIC-Th-2 | -3.745       | 1.176            | 1.413            | 1.321            | 1.189            |
|              |              |              | ITIC-Th-3 | -3.716       | 1.205            | 1.442            | 1.350            | 1.218            |
|              |              |              | ITIC-Th-4 | -3.706       | 1.215            | 1.452            | 1.360            | 1.228            |
|              |              |              | IT-OMe-1  | -3.389       | 1.532            | 1.769            | 1.677            | 1.545            |
|              |              |              | IT-OMe-2  | -3.538       | 1.383            | 1.620            | 1.528            | 1.396            |
|              |              |              | IT-OMe-3  | -3.501       | 1.420            | 1.657            | 1.565            | 1.433            |
|              |              |              | IT-OMe-4  | -3.492       | 1.429            | 1.666            | 1.574            | 1.442            |
|              |              |              | SeTIC     | -4.364       | 0.557            | 0.794            | 0.702            | 0.570            |
|              |              |              | SeTIC-F   | -4.556       | 0.365            | 0.602            | 0.510            | 0.378            |
|              |              |              | SeTIC-Cl  | -4.576       | 0.345            | 0.582            | 0.490            | 0.358            |

An useful parameter that influences the PCE in the OSC devices is the fill factor. The fill factor is determined theoretically by the following equation.

$$FF = \frac{\frac{eV_{OC}}{k_B T} - \ln\left(\frac{eV_{OC}}{k_B T} + 0.72\right)}{\frac{eV_{OC}}{k_B T} + 1} \quad (1)$$

Here,  $\frac{eV_{OC}}{k_B T}$  is the normalized  $V_{OC}$ ,  $e$  is the elementary charge,  $k_B$  is the Boltzmann's constant, and  $T$  is the temperature (300 K).

**Table S3:** The experimental Fill-factor (FF), open circuit voltage ( $V_{OC}$ ), and  $J_{SC}$  of the NFAs. The superscripts a, b, and c represent donor polymers, PBDB-T-SF, FTAZ, and PBDB-T, against which the measurements were conducted.

| Acceptors               | FF    | $J_{SC}$ (mAcm <sup>-2</sup> ) | $V_{OC}$ (V)       |
|-------------------------|-------|--------------------------------|--------------------|
| IT-H <sup>S1</sup>      | 0.721 | 17.03                          | 0.9 <sup>a</sup>   |
| IT-F <sup>S1</sup>      | 0.71  | 20.88                          | 0.88 <sup>a</sup>  |
| ITIC-Th <sup>S2</sup>   | 0.61  | 15.84                          | 0.915 <sup>b</sup> |
| ITIC-Th-3 <sup>S2</sup> | 0.73  | 19.33                          | 0.849 <sup>b</sup> |
| IT-OMe-1 <sup>S3</sup>  | 0.51  | 12.31                          | 1.01 <sup>c</sup>  |
| IT-OMe-2 <sup>S3</sup>  | 0.73  | 17.53                          | 0.93 <sup>c</sup>  |
| IT-OMe-3 <sup>S3</sup>  | 0.68  | 16.38                          | 0.97 <sup>c</sup>  |
| IT-OMe-4 <sup>S3</sup>  | 0.56  | 14.69                          | 0.96 <sup>c</sup>  |

## References

- (S1) Zhao, W.; Li, S.; Yao, H.; Zhang, S.; Zhang, Y.; Yang, B.; Hou, J. Molecular optimization enables over 13% efficiency in organic solar cells. *J. Am. Chem. Soc.* **2017**, *139*, 7148–7151.
- (S2) Zhao, F.; Dai, S.; Wu, Y.; Zhang, Q.; Wang, J.; Jiang, L.; Ling, Q.; Wei, Z.; Ma, W.; You, W., et al. Single-junction binary-blend nonfullerene polymer solar cells with 12.1% efficiency. *Adv. Mater.* **2017**, *29*, 1700144.
- (S3) Li, S.; Ye, L.; Zhao, W.; Zhang, S.; Ade, H.; Hou, J. Significant influence of the methoxyl substitution position on optoelectronic properties and molecular packing of small-molecule electron acceptors for photovoltaic cells. *Adv. Ener. Mater.* **2017**, *7*, 1700183.
